# Supplementary material
Source: Springer Nature journal article supplement (https://www.springermedizin.de/resource/supplementary/12913_2012_2585_MOESM4_ESM.pdf/9530978)
Supplement: MOESM4 [file 9530978]

1.2

1

0.8

0.6

0.4

0.2

0

2000

2001

2002

2003

2004

2005

2006

2007

2008

2009

|               |        |        |        |        |        |        |        |        |        |        |
|---------------|--------|--------|--------|--------|--------|--------|--------|--------|--------|--------|
| Age           | 0      | 0      | 1.47%  | 0.82%  | 0.10%  | 0.37%  | 2.36%  | 1.05%  | 0.51%  | 1.21%  |
| Father's Name | 3.34%  | 52.50% | 46.69% | 20.97% | 6.66%  | 22.01% | 34.47% | 16.06% | 15.20% | 8.99%  |
| Address       | 99.70% | 65.20% | 48.45% | 22.67% | 6.31%  | 20.80% | 30.17% | 15.69% | 11.99% | 7.87%  |
| Phone Number  | 100%   | 99.50% | 62.19% | 46.33% | 31.86% | 37.92% | 42.97% | 22.81% | 22.72% | 14.60% |
| Encoding      | 1.27%  | 4.10%  | 3.13%  | 2.87%  | 4.44%  | 4.56%  | 6.05%  | 6.04%  | 6.36%  | 5.64%  |
